# Supplementary material
Source: PubMed Central journal article supplement (PMC4690522)
Supplement: NIHMS745342-supplement-Supporting_Information.pdf [file NIHMS745342-supplement-Supporting_Information.pdf]

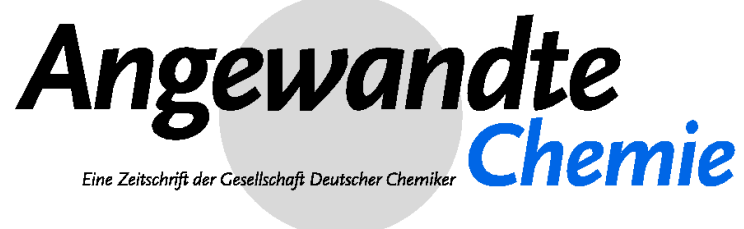

Supporting Information

© Wiley-VCH 2005

69451 Weinheim, Germany

**Evidence that Electrostatic Interactions Dictate the Ligand-Induced  
Arrest of RNA Global Flexibility\*\***

Stephen W. Pitt, Qi Zhang, Dinshaw J. Patel, and Hashim M. Al-Hashimi\*

---

[\*] Prof. H. M. Al-Hashimi, Q. Zhang

Department of Chemistry and Biophysics Research Division

University of Michigan,

Ann Arbor, MI 48109

Fax: (+1) 734-647-4865

E-mail: [Hashimi@umich.edu](mailto:Hashimi@umich.edu)

Prof. D. J. Patel, Dr. S. W. Pitt

Cellular Biochemistry and Biophysics Program

Memorial Sloan-Kettering Cancer Center

**Figure S1.** Correlation plot between one bond C1'H1', C2H2, C5H5, C6H6, C8H8, N1H1, and N3H3 RDCs measured using NMR frequency experiments in which splitting are measured along the direct ( $^1\text{H}$ ) or indirect ( $^{13}\text{C}/^{15}\text{N}$ ) dimension (see ref 7d) for a) TAR-NeoB and b) TAR-AcP.

**Figure S2.** Correlation plot between measured RDCs and values back-calculated using the best fit order tensor for a) TAR-NeoB using NMR model 10 (PDB code 1QD3) and an idealized helix for domains I and II respectively and b) for TAR-AcP using idealized A-form helices for both domains I and II respectively.

**Figure S3.** Best-fit  $\vartheta$  values for domains I and II in TAR-AcP determined using idealized A-form helices as input structures in which ~20% of the input RDC data is randomly omitted from the  $\vartheta$  calculations. Twenty-five such reiterations are shown.

**Table S1.** RDCs (in Hz) measured in the TAR-NeoB complex (1:2 molar ratios).

**Table S2.** RDCs (in Hz) measured in the TAR-AcP complex (1:2 molar ratios).

Supporting Figure 1 Pitt et al.

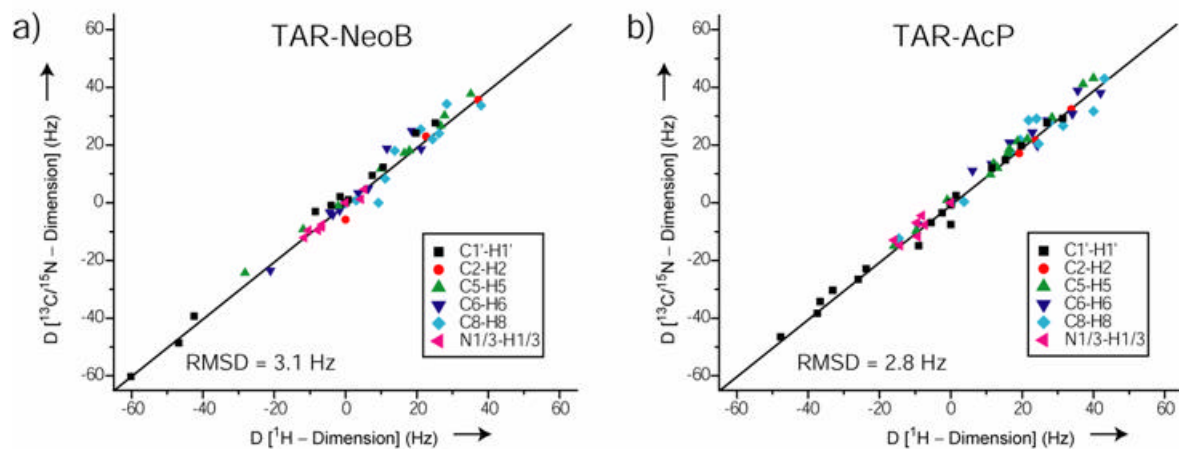

Supporting Figure 2 Pitt et al.

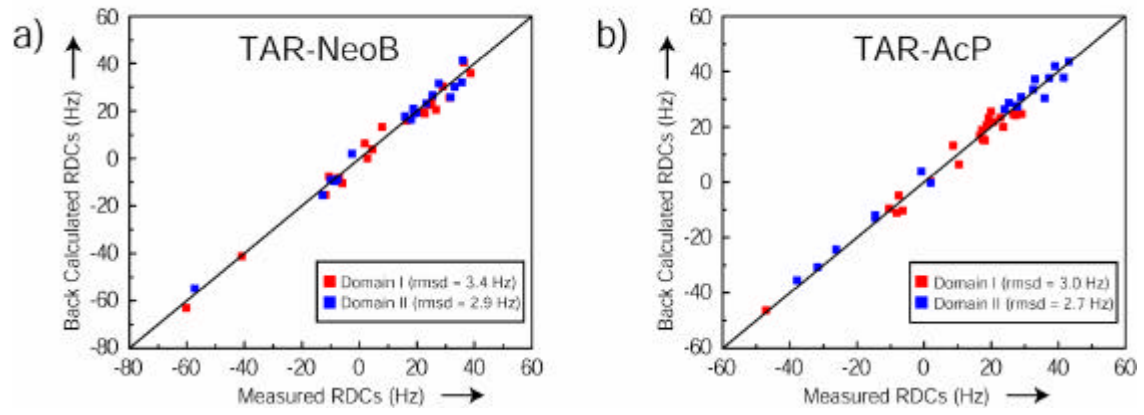

# Supporting Figure 3 Pitt et al.

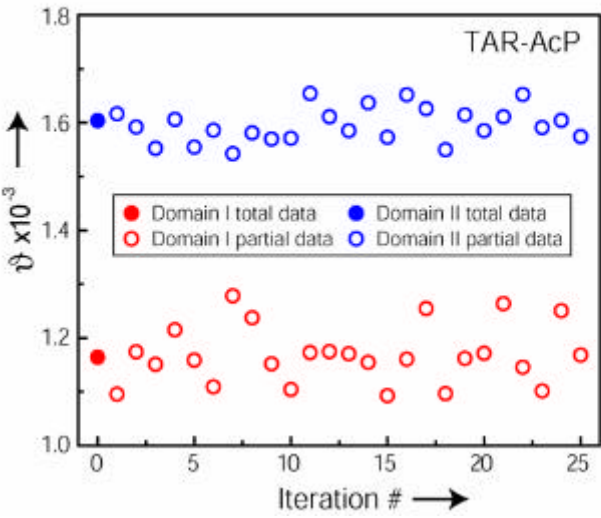

Table S1 TAR-NeoB (1:2) Phage RDCs

| <b>Residue(Stem1)</b> | <b>RDC(Hz)</b> | <b>Residue(Stem2)</b> | <b>RDC(Hz)</b> |
|-----------------------|----------------|-----------------------|----------------|
| C19(C5H5)             | -10.5          | G26(C1'H1')           | -2.5           |
| C19(C6H6)             | 16.5           | G26(C8H8)             | 35.9           |
| A20(C1'H1')           | -60.2          | G26(N1H1)             | -12.8          |
| A20(C2H2)             | -5.9           | A27(C1'H1')           | 31.7           |
| A20(C8H8)             | 4.6            | A27(C2H2)             | 35.6           |
| G21(C1'H1')           | -40.9          | A27(C8H8)             | 25.5           |
| G21(C8H8)             | 25.1           | G28(C1'H1')           | 27.6           |
| G21(N1H1)             | -11.8          | G28(C8H8)             | 15.9           |
| A22(C2H2)             | 22.8           | G28(N1H1)             | -7.6           |
| A22(C8H8)             | 31.3           | C29(C6H6)             | 18.8           |
| U40(C5H5)             | 26.7           | G36(C1'H1')           | -57.2          |
| U40(C6H6)             | 29.0           | G36(C8H8)             | 23.2           |
| C41(C5H5)             | 36.4           | G36(N1H1)             | -8.6           |
| C41(C6H6)             | 24.4           | C37(C6H6)             | 19.9           |
| U42(C1'H1')           | 38.6           | U38(C6H6)             | 19.1           |
| U42(C6H6)             | 7.9            | U38(N3H3)             | -10.0          |
| U42(N3H3)             | -7.1           | C39(C5H5)             | 18.0           |
| G43(C1'H1')           | 21.9           | C39(C6H6)             | 33.1           |
| G43(C8H8)             | 1.9            |                       |                |
| G43(N1H1)             | 2.8            |                       |                |

Table S2 TAR-AcP (1:2) Phage RDCs

| <b>Residue(Stem1)</b> | <b>RDC(Hz)</b> |
|-----------------------|----------------|
| G18(C1'H1')           | -47.1          |
| G18(C8H8)             | 2.0            |
| G18(N1H1)             | -7.5           |
| C19(C6H6)             | 23.7           |
| A20(C2H2)             | 22.7           |
| A20(C8H8)             | 26.6           |
| G21(C8H8)             | 20.7           |
| G21(N1H1)             | -6.3           |
| A22 (C2H2)            | 18.1           |
| A22(C8H8)             | 17.3           |
| U40(C5H5)             | 20.0           |
| C41(C5H5)             | 16.7           |
| C41(C6H6)             | 18.7           |
| U42(C1'H1')           | 27.3           |
| U42(C5H5)             | 10.5           |
| U42(C6H6)             | 19.2           |
| U42(N3H3)             | -8.2           |
| G43(N1H1)             | -10.5          |
| G43(C8H8)             | 29.1           |
| C44(C5H5)             | 17.5           |
| C44(C6H6)             | 8.6            |

| <b>Residue(Stem2)</b> | <b>RDC(Hz)</b> |
|-----------------------|----------------|
| G26(C1'H1')           | -37.9          |
| G26(N1H1)             | -14.5          |
| G26(C8H8)             | 35.9           |
| A27(C1'H1')           | -31.8          |
| A27(C2H2)             | 33.1           |
| A27(C8H8)             | 27.6           |
| G28(C1'H1')           | -26.2          |
| G28(C8H8)             | 25.2           |
| C29(C6H6)             | 37.3           |
| G36(C8H8)             | 43.1           |
| C37(C5H5)             | 39.1           |
| C37(C6H6)             | 32.5           |
| U38(C1'H1')           | -0.8           |
| U38(N3H3)             | -14.5          |
| U38(C5H5)             | 41.6           |
| U38(C6H6)             | 27.8           |
| C39(C1'H1')           | 2.0            |
| C39(C5H5)             | 28.9           |
| C39(C6H6)             | 24.0           |
